# Supplementary material for: Managing Fetal Ovarian Cysts: Clinical Experience with a Rare Disorder
Source: MDPI journal article supplement (doi:10.3390/medicina59040715), 2023-04-06
Supplement: s1 [file s1]

## Supplementary materials

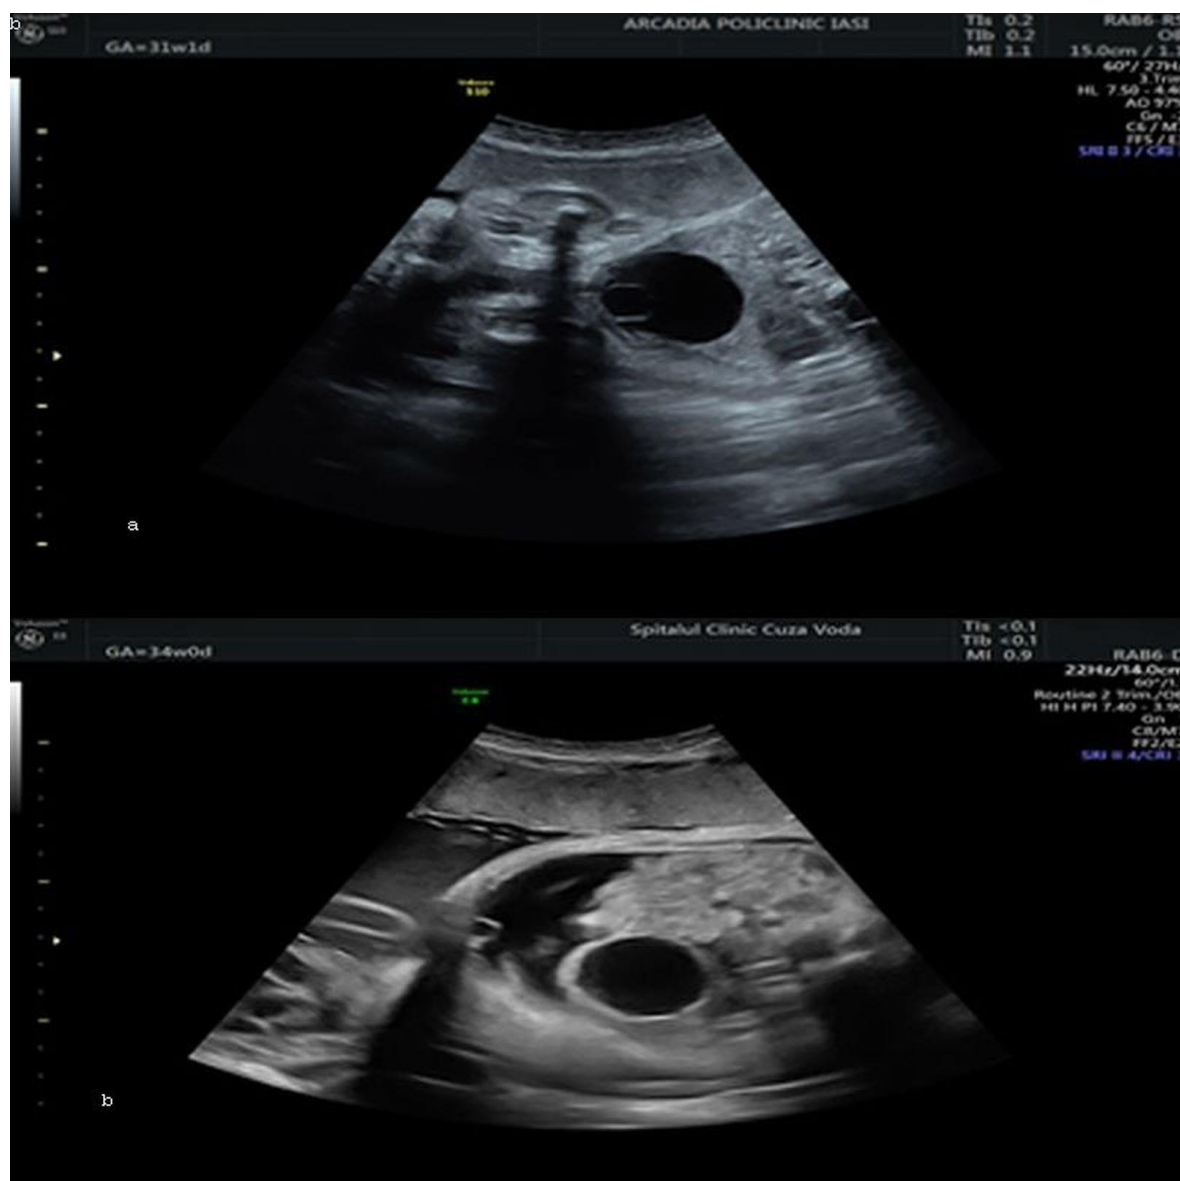

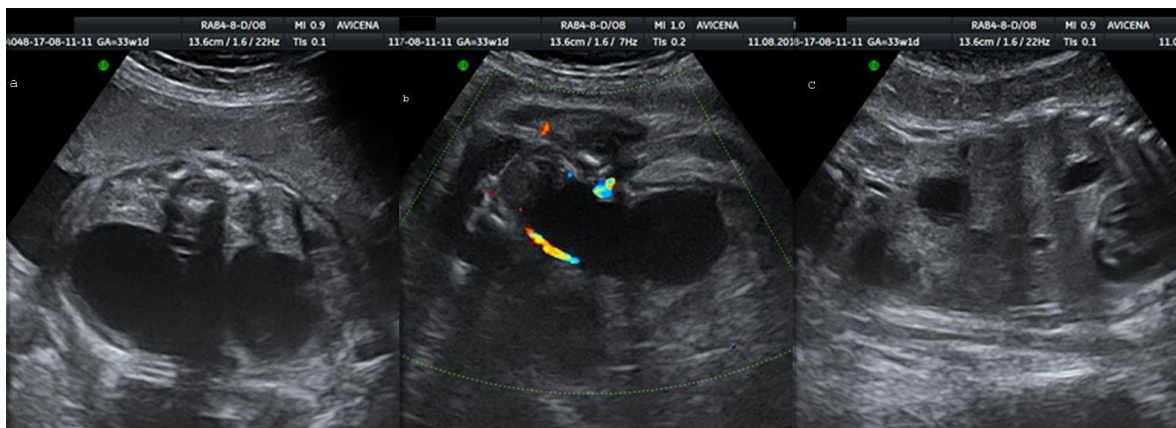

**Figure S2.** A 22-years old patient, IG IP, 33w. Size reduction in postpartum (a) bilateral simple ovarian cysts: right: 35,3mm; left: 38,5mm; (b) differential diagnostic with bladder; (c) Differential diagnostic with stomach.

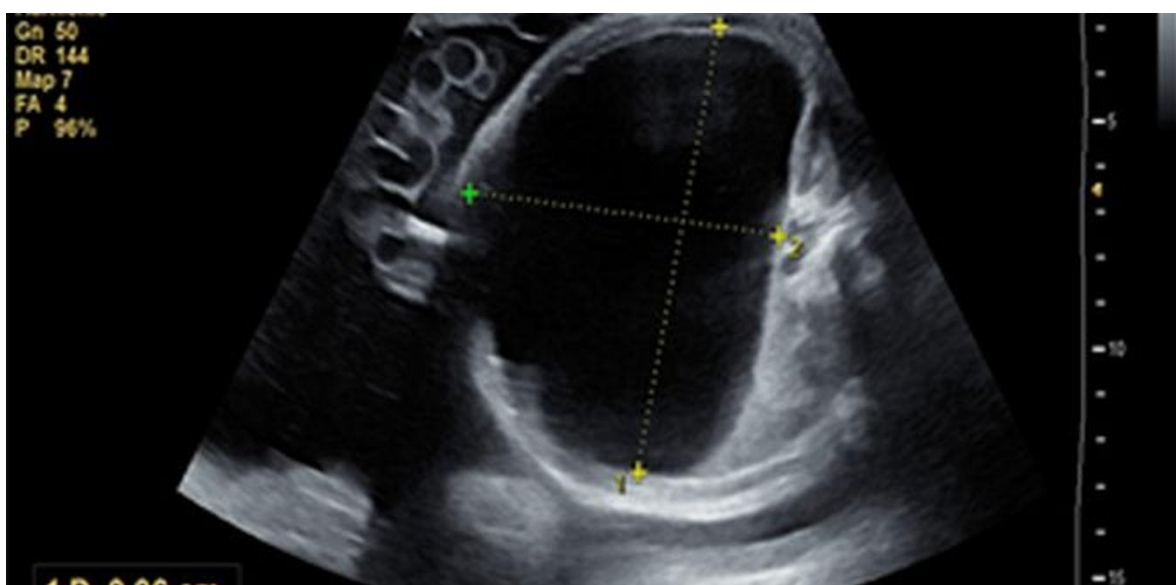

**Figure S3.** A 36-years old patient, IG IP 31weeks, serous simple cyst of 5,6/4.08cm; Evolution with increasing in volume until 10,16/8,54cm, with bowel compression and polyhydramnios (AFI=27cm); Growth and torsion. Ovariectomy for torsion.

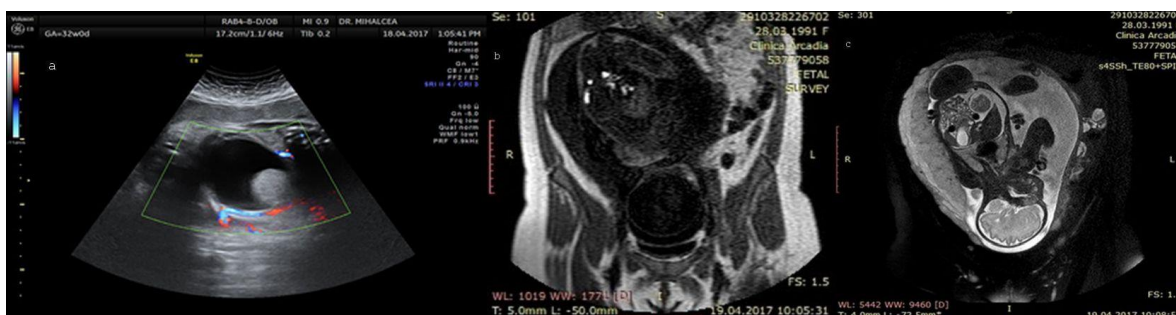

**Figure S4.** A 33-years old patient, IG IP, diagnosed at 33w with a fetal abdominal cystic mass of 70,4/58,3mm diameter, with a solid intracystic component of 29,2/30mm (ovarian teratoma or enteric cyst) In disagreement with the protocol, the family choose follow-up. At 6 months the tumor persists, but the dimensions are smaller: 32/32mm, and it keeps the same size at 1 year follow-up. (a) The ultrasound aspect; (b) The fetal MRI describe the cyst as teratoma of the ovary. T1 sequence; (c) The fetal MRI in T2 sequence.

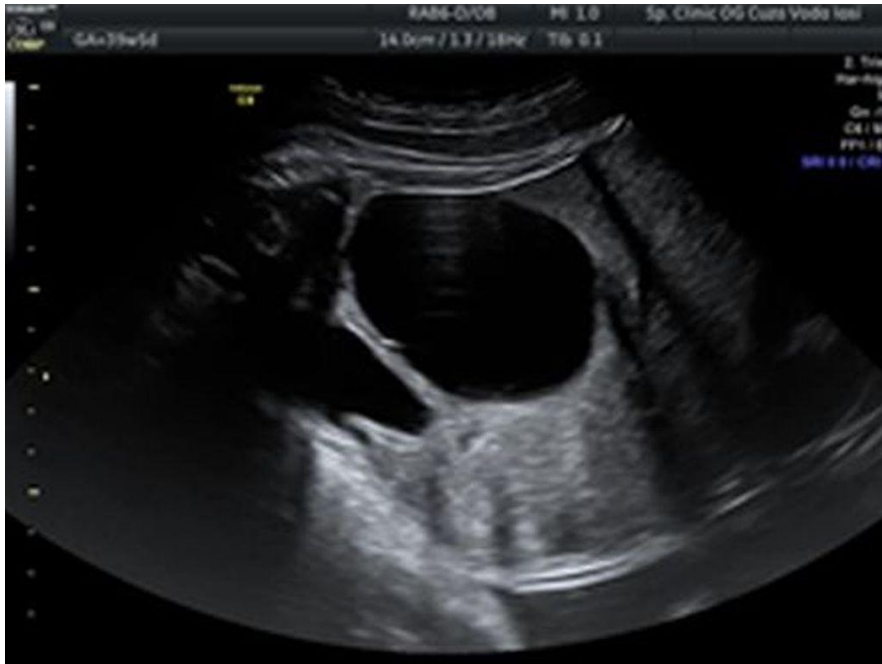

**Figure S5.** A 33-years old patient, IG IP, hospitalized for a fetal abdominal cyst of 6cm diameter. Cesarean delivery at 40w for anterior uterine scar (myomectomy). Stable general condition of the newborn. Pediatric surgery consultation at 2 weeks after birth and the decision is made for surgery due to the complex appearance of the cyst and the size that remains at 6-7 cm- ovariectomy performed for ovarian torsion with necrosis and intracystic hemorrhage .
